# Supplementary material for: Convergent evolution of tRNA gene targeting preferences in compact genomes
Source: PubMed Central journal article supplement (PMC5006619; doi:10.1186/s13100-016-0073-9), 2016-08-31
Supplement: 13100_2016_73_MOESM1_ESM.pdf [file 13100_2016_73_MOESM1_ESM.pdf]

## Additional File 1

### Convergent evolution of tRNA gene targeting preferences in compact genomes

Thomas Spaller, Eva Kling, Gernot Glöckner, Falk Hillmann, Thomas Winckler

#### Content

- Figure S1 Alignments of GPY/F motifs in dictyostelid LTR retrotransposons.
- Figure S2 Alignments of RT, RNH, and IN domains of dictyostelid LTR retrotransposons.
- Figure S3 Phylogenetic analysis of dictyostelid LTR elements.
- Figure S4 Alignment of RT domains of dictyostelid non-LTR retrotransposons.
- Figure S5 Phylogenetic analysis of RT domains of dictyostelid non-LTR elements.
- Figure S6 Alignment of dictyostelid non-LTR elements bearing RNH domains.
- Figure S7 Phylogenetic analysis of RNH domains of dictyostelid NLTR elements.
- Table S1 Comparison of retrotransposon in annotated dictyostelid genomes.
- Table S2 Association of tRNA genes with TREs in the *D. discoideum* genome.

Supplemental references





B

Dd\_Skipper-1 HLYCDVSDKALSGLVYQIQGN----KFKV----TWFHSRKLTDTQK-RYSIGDREFLSIIIDSLK
Dp\_Skipper-1 HLYCDASDRALSGVLYQIQGN----SFKP----TWFHSRKFSDTQK-RYSIGDREFLAIIDSLK
Dl\_Skipper-1 RIETDASDFAVGAVLTKO-----EQNEFVTIGFESRKLNKAEK-RYSAYDRELVAVIHALK
Pp\_Skipper-1 HVYTDASDVSGGLMIAOYDDNN----NLRP----VLFDAKFDASAQR-NYSARDRELLAFIHAVT
Df\_Skipper-1 VIHTDASNVCVGSVVSQ-----LDEDGEYHPVIFESRKMTPAER-NYSTTDRELLAAIHVLQ
Dd\_Skipper-2 -VYIDASDICTGCVTMDDDGNG--NIRP----LLYDSCRFNKFLR-NYSTTDRELLALINVLQ
Dp\_Skipper-2 HVIYDASDVGTGCMITQDFSDN-----NERP----VLYDSKKFNSFQK-SYSTTDRELLALINVLK
Pp\_Skipper-2 FVYTDASDICTISVVICOKDEKG--VLKP----VLSGRRLLKPGEQ-IKSIGARELLAIKYFLK
Df\_Skipper-2 TVTDDASDFGIGAVLEO-----DGR----PVAFESRKMTKAER-GMSTRDKEALAVYHSFK
Pf\_Skipper-1.1 WLMTDASRVGIGAVLLOGEDWRT-----ARPCGFWSRQYISAER-NYPHTEQELLGVVAAMK
Pf\_Skipper-1.2 FLVTDASQFGCGGWLGGANLES-----ARPAEFSTKFNRAQH-VYTTTDOELLGVLNGCR
Pf\_Skipper-1.3 YLFTDASIFRCGGWLCGPDAAES-----VRPFRYFSAKFNSAQR-NYTTTDOELLGVLNGCR
Dd\_DGLT-A VIETDASIIIGIGVMIO-NGK-----PVSYYSRTLNNAEK-NYSVTERECLAITIESIK
Dp\_DGLT-A1 IIEETDASNIIGIGAVLIO-NNN-----IVAVFSEALNDAQT-RYITITEKECLAIVQAIK
Dp\_DGLT-A2 TIEETDASGIGIAAVLLO-DGK-----PVLNFSQLLPPRVK-EIPTIEREAKAVIASLI
Dd\_DGLT-A3 VIECDASGIGLAGVLLQ-ENK-----VVKFYSRTLNSAER-NYSTTERECLAMVECHK
Dl\_DGLT-A1 ELHTDASMKCMGAVLYO-DKK-----IVAFESKTYSSSES-NWSADEFECYAVILALK
Dl\_DGLT-A2 VLETDASGVGVGATLLO-DSK-----VTSWFSRKFENEKILITACEKECYAIVLALK
Pp\_DGLT-A1 HIDCDASNDGIGHVYQY--KD----NIEQEDNKQIVLYGSKKFNTER-DYHVFEQVMAIKHALE
Pp\_DGLT-A2 HLECDASKYGIGHALYQINKLD--NITR----DFTSRGRKLTISEI-NYTVLEKELLSITHALK
Pp\_DGLT-A3 IFECDASDVGTGYRFLQL--VD----GKE----NVICYGSRKLDKSET-RYSTLEKELLAIVTALK
Pf\_DGLT-A IIEETDASVEGFGAVLAQRFSYPHSETGKLVKEVHPVEYISRSTKPSK-RYSAFLLELWAVKWALE
Sc\_Ty3 RLTTDASRDKGIGAVLEEDVNKN----KLVG----VGYGFSKSLESAQK-NYPAGELELLGIIKALH

Dd\_Skipper-1 KFQHLIICKKVSITDHNQNLTYIINKSNDKPFTRQDNYMKYIKFEDYELRHISGKKNGIADFLSR
Dp\_Skipper-1 KFQYLLGKVKVTIYSDHNQNLTYIINKSNDKPFTRQDGYMKYIKFEFYEELKHISGKKNGIADFLSR
Dl\_Skipper-1 KWRYIILGKEIEIIFDHOPLTRI--LEQPMIQTTHQARRIEFLSEFNKFKHIDGKANVADALS
Pp\_Skipper-1 RYGYLLS-RPFVFDHDKNLIYNSQND--MDNPRLVWRSEILSRFSFQTSYIPGKNCMADYLSR
Df\_Skipper-1 KYRHHFLGRKVTIYTDHNNLTYW--DSKHQLS-ARERNWLEILGFFDIKFEYIPGETVADALS
Dd\_Skipper-2 RHGYMLKDKKFRFLTDHNLNLYYEEELK--EPTKRIIRYLDKASEYKFEVIHVRGEDNNIADMLSR
Dp\_Skipper-2 KFDYLLGNKFIIVYSDHNLNAHYQTKQ--ETPKRLIRWLDLISMFYSYELVHIEGKKNVADFLSR
Pp\_Skipper-2 KHSDIILGPKLNIYTDHFNLLYLKDAQ--ILTKDQKALEVLSQFNYEINHIEGKKNVADFLSR
Df\_Skipper-2 KWRHYLVGKDFILFSDHTAISR--IEDAVGTDDKVGWRARFIFGFRYTFKHKPGKLNVADALS
Pf\_Skipper-1.1 ARWLELVGVKFKVLTDDHTLRHFKTQPT--LSKROARWMETLADYDYELAYIPGKKNVADAMS
Pf\_Skipper-1.2 KMHEHLIGSHFTVVCDEHPLKTYWSPQPK--QDRRRERLWETLAEYDFDWFLETPGKKNVADSLR
Pf\_Skipper-1.3 KMHEHLVGVHFFVVRCDHEPLKTYWEQPK--QTRRSRTTWEOLAEYDFEWSFIPGKKNVADSLR
Dd\_DGLT-A1 YFKSYINGRKVKITTDHOPLKYLTKGK--TDR--TRWTVLLOEYNYEIIYRPGKKNVADALS
Dp\_DGLT-A1 KFRGYINGRKIRIITDHOPLVYIKNGKF--TSR--ISKWSIYLSBYDYEIIYRPGKKNVADALS
Dp\_DGLT-A2 YFHPYIYKKEVTITDHPKLEAANKIPO--TNRTLILKLSYILTDYRAQIVYKPGKKNVADAMS
Dp\_DGLT-A3 AFSSYIKGRKVTITTDHAPLVHLSTGSF--SPR--VORITLYLOEODVEIRYRPGKKNVADLTSR
Dl\_DGLT-A1 HFHHLIACTSITIEEDNLALLESKLTGNI--KNKRILAKWSMEIAYDYHIKHREGRKNVADSLR
Dl\_DGLT-A2 HFHYIVASSPITVITDNNALLALKDGKI--KNSRLLKWKQLTAEYQITLVHKEGKKNVADALS
Pp\_DGLT-A1 SNYHMLLYGKIVITDHDQNLFTNNKLN-DNTKPKLIRWLOQYIFSENPTLIYKKGSDNVVADGLSR
Pp\_DGLT-A2 VNYHYLIGHEVINTDHKNIKFLREQYA-IGINSRINRWLQFIELEFNPTLOYIKGETNVVADGLSR
Pp\_DGLT-A3 ANYYHIFGRDIEIRTDHKNITINEANK-IGINQTNRWIAHINLYOPKIKFIKGETNVVADGLSR
Pf\_DGLT-A KFKPYVFRPIELISDQCALAGT--LSLSQVSPAHSRWREYIILGHDIIKFTHRPGKANVADGLSR
Sc\_Ty3 HFRYMLHGKHFTRLTDHISLLSLQNKNE--PARRVQRWLDLDTATYDFTEYLELAGPKNVADALS

C

Dd\_Skipper-1 ISIDFLSLPKTMYAINGFTVEVDQVCVIVCRLSKRVHIVPCHKTIDAQHTAQLLNH
Dp\_Skipper-1 ISIDFLSLPKTPYTFSGFIVEVDQVCVIVCRLSKRVHIVPCKSTITAEQADLLNH
Dl\_Skipper-1 ITMDFVVALP-----KSN--GFDSVLTVTDKS TKMVHLIPTSTNVTAQVAKLFDN
Pp\_Skipper-1 ISMDLALPAAD--TGE---GNLFVVVDRFTRKMTLRLPCHKDVTALQLGNWEARE
Df\_Skipper-1 ISMDFMSLPTSK---NGM---DNLLVVVDRLSKRVHLMACKEIDAVGTAKLFFNN
Dd\_Skipper-2 ISMDFLNLPKN---SGK---DSVMVIVD-YOKCVRYFPCTKELKADAEAKLFWDN
Dp\_Skipper-2 VTMDFLSLPTTQ---DGN---DYLEVVVDRLSKRVHLMVCLIPCKKTTITASQVSKLFWDN
Pp\_Skipper-2 ISMDFMELPKSV---NGY---DYVLLVVVDRFSKYTTIIPPTKEITALGTAKLHQQ
Df\_Skipper-2 VTLDFMVDLPP--A-RGT--GHNALLTIVDKFSKRVVYVYIPFVNATAEATVAVLYDQ
Pf\_Skipper-1.1 VALDFVGPLP---ASE--VKDMLLTIIDRLSGYTRLVACKAKDGAKEVAGLFFSE
Pf\_Skipper-1.2 VGMDFMTGLPPVY-AGE--TVDAVLTVTDYLSKRVVLIPLPSTADAPQVAALFFRA
Pf\_Skipper-1.3 IGMDFVGLPIVNS-GGK--AIDSILSVTCYRSKRVVVLPLPSTATAADVAGLFFVDS
Dd\_DGLT-A1 IGDIFLGPITKDNA-----QVYLLVVMDFYFKWPEVFFTL-DMEGETVAQLLYE
Dp\_DGLT-A1 IGDIFVGPITERNQ-----KIYFLVIMDYFSKWPELFTVT-ECTANIVAEILYTE
Dp\_DGLT-A2 VGMDFL-TVTKNVE-----TINLVIIDYFTRWPEAFFTP-DQSAKNVASILFFQ
Dp\_DGLT-A3 VGDIFVGPITHEQNQ-----PILYLVIIDYFTRWPEAFFTP-SMEAQIVARILVHE
Dl\_DGLT-A1 VGDIFMGPRTIS-----GMKYLILSCLFTRKVVVEVFTD-DSTAVTVAKHYVED
Dl\_DGLT-A2 IGDIFVGPISVESN-----GNRYMLVITDYFSKWVEAFATV-NADAITTAHLVKE
Pp\_DGLT-A1 ISMDFLP-LIDTEY-KCI--KYNKVVIVDRLSKRVRLIPVHSTYTSKDLAEIFMKE
Pp\_DGLT-A2 LSCDFITNLNEVEDSNGR--KFNQIWIIVDRFSKYTTLIPHTSTYTSLELARLPSSE
Pp\_DGLT-A3 INIDIFPNLPVEEY-MGR--KVDAIMVVVDALSKMTRLIPLGSDYTSKEVIDLPHKE
Pf\_DGLT-A LSMDFLSLPTAR-----FKSDLVIVDYFSRYTWVYKFDGDTGAKTVKSLR-D
Sc\_Ty3 ISMDFVTVGLPPTSN-----NLNMLLVVDRFSKRAHFIAATRTKTLDAQLIDLFRY

Dd\_Skipper-1 VFRLHGYPRTIIVSDRDPKFLSEIWERWAKTMDSK-LKMTVAHRAQADGOTERMNREI
Dp\_Skipper-1 VFRLHGYPRTIIVSDRDPKFLSEIWTLWAKTMDSK-LKMTVAYRAQGDGOTERMNREI
Dl\_Skipper-1 IWRLHGYPKVIIVSDRDPKFTSNFWKSTFKRLG-N-QFLSTAFHPQTDGQSERTNRTM
Pp\_Skipper-1 IIAVFGAPSSIVSDRDPKFTSELWTSMMKAI GTE-LKMTOPGRAQADGOTERTNRSI
Df\_Skipper-1 VFRLHGLPSSIVSDRDPKFTSDLWSELMTAIGTK-LKMTSPNRPQGDGOTEIYNRTI
Dd\_Skipper-2 IVCNFGLPATIVSDRDKLFTSDLWNNLMEISGVK-LKMTAPRRPQADGOTERMNRNI
Dp\_Skipper-2 IVCNFGLPATIVGDNNDKLFTELEWGLIKETGMV-LKTAPGRAQADGOTERVNRTL
Pp\_Skipper-2 VFSLFGPLSIVSDRDRFTSELWLELFKKGVSRLRMSVPRHPQSDGQSERTNRRI
Df\_Skipper-2 FYLRYGLPNIVSDRDAKFTSNFWALFKLLGSK-LSFSSSFHPQTDGQSERMNRVT
Pf\_Skipper-1.1 WVRFGTPERIVSDRDKLVTSKFWKSLHKRLGTRKOVQLSTAFHPETDGRSERTNK--
Pf\_Skipper-1.2 VVARFGLPAAIVSDRDPKFTSAFWTTLYKMGV-LKMTSAHPQTDGRAEVTNKTIV
Pf\_Skipper-1.3 VYRRFGLPDAIVSDRDPKFTGAFWRALHARLGR-LKMTSAHPQTDGRAEATNKVV
Dd\_DGLT-A IYTRYGVPKKIVSDRGKNIISNVVSGVKNKLVGH-KLTTAYHPQCDGOTENFNNTL
Dp\_DGLT-A1 IFIRYGAPEKLLSDRGTAFLSEVVQGINNIFKVT-KVNTTAYHPQNTGLTENFNNTI
Dp\_DGLT-A2 IFLKFGAPKLLTDRGANFLSQVITELNHFVRVSKVSTAYHPQTDGAEKFNSTL
Dp\_DGLT-A3 IFIRYGAPEKLLSDRGTOFLSKVVTGVNELFRVK-SILTTAYHPQANGOTENFNNTL
Dl\_DGLT-A1 IFIRYGAPEKLLSDRGKVFSELIABINSYFKVK-KISTTPYHPQNTGHNERNCKNSI
Dl\_DGLT-A2 IISRYGIPKKTIVSDLKVFLSDELIKDVRNLFMVE-KLSTTPYHPQCDGLTERFNQII
Pp\_DGLT-A1 IFKHHGMPVEIVSDRDKFTSKFKWDLMDILNCE-IRTTAENQOANGQVESIRYL
Pp\_DGLT-A2 FIKIHGMPVEIVSDRDKFTSKFKWDLMDILNCE-IRTTAENQOANGQVAEIVRAI
Pp\_DGLT-A3 IFLKHLGPIELVSDNDSKLTSKLFLKQTKAYGCH-HSTSAVSNQOANGQAEIRIAV
Pf\_DGLT-A IFLNRGPRQVLLSDNDRHFNACEVRSFCSEEGVT-FRTTPTYSPTNGLVERTNGLL
Sc\_Ty3 IFSYHGFPRTIIVSDRDRVMTADKYQELTKRLGK-STMSSANHPQTDGQSERTQTL

### Figure S3: Phylogenetic analysis of dictyostelid LTR elements.

Alignment of the concatenated core domains of RT, RNH, and IN was generated with CLUSTALX and analyzed using the Neighbor Joining method. Numbers next to each node indicate bootstrap values as percentages out of 1000 replicates. All positions containing gaps and missing data were eliminated. The tree is drawn to scale, with branch lengths in the same units as those of the evolutionary distances used to infer the phylogenetic tree. Retrotransposons integrating upstream and downstream of tRNA genes are indicated in red and blue boxes, respectively. Dd: *D. discoideum*; Dp: *D. purpureum*; Dl: *D. lacteum*; Df: *D. fasciculatum*; Pp: *P. pallidum*; Pf: *Protostelium fungivorum*.

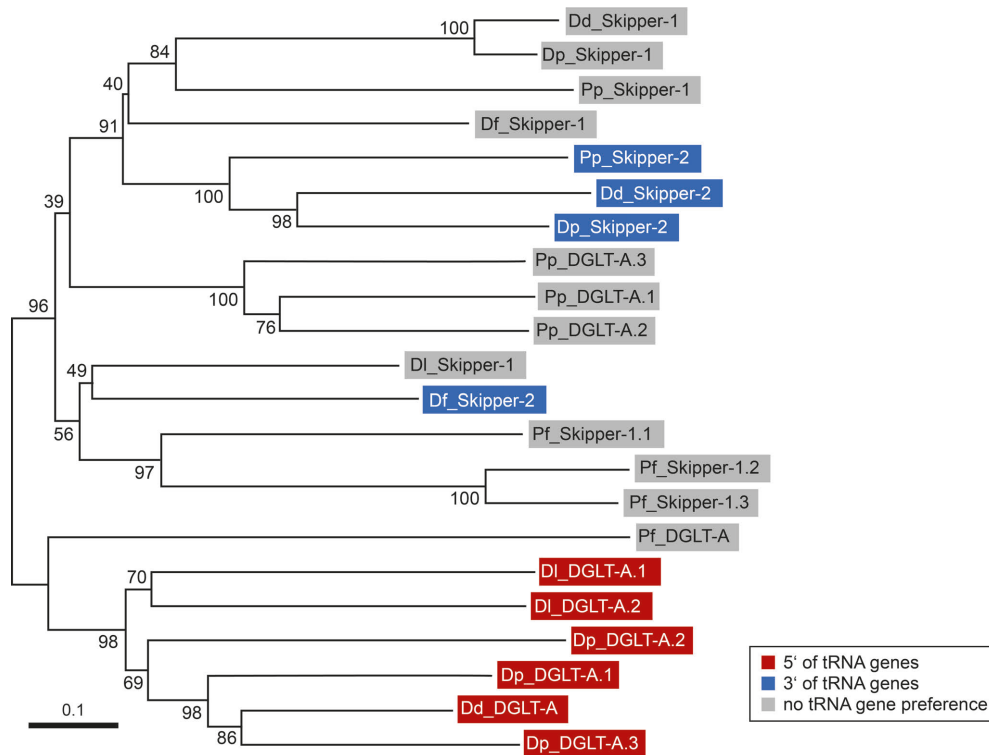



**Figure S5: Phylogenetic analysis of RT domains of dictyostelid non-LTR elements.**

Alignment of the RT domains was generated and analyzed with MEGA7 [5] using the Neighbor Joining method. All positions containing gaps and missing data were eliminated. Numbers next to each node indicate bootstrap values as percentages out of 1000 replicates [6]. The tree is drawn to scale, with branch lengths measured in the number of substitutions per site. The tree was rooted on RT domains of group II introns.

Sequences used for alignment with dictyostelid NLTR elements were chosen according to a previous phylogenetic analysis performed by Malik et al. [7]: *Trypanosoma brucei* SLACS (X17078), *Trypanosoma cruzi* CZAR (M62862), *Crithidia fasciculata* CRE1 (M33009), *Crithidia fasciculata* CRE2 (U19151), *Drosophila melanogaster* R2 (X51967), *Drosophila mercatorum* R2 (AF015685), *Forficula auricularia* R2 (AF015819), *Bombyx mori* R2 (M16558), *Porcellio scaber* R2 (AF015818), *Bombyx mori* Dong (L08889), *Ascaris lumbricoides* R4 (U29445), *Rattus norvegicus* L1 (U83119), *Mus musculus* L1 (AF081114), *Canis lupus* L1 (AB012223), *Homo sapiens* L1 (U93574), *Oryzias latipes* swimmer (AF055640), *Cyprinodon macularius* swimmer (AF055643), *Xenopus laevis* Tx1 (M26915), *Zea mays* Cin4 (Y00086), *Arabidopsis thaliana* Ta11 (AAC13599), *Dictyostelium discoideum* TRE5-A (X57034), *Chlorella vulgaris* Zepp (AB008896), *Aedes aegypti* JAM1 (Z86117), *Caenorhabditis elegans* RTE1 (AF025462), *Colletotrichum gloeosporioides* Cgt1-3 (L76169), *Magnaporthe grisea* Mgr583 (AF018033), *Ascobolus immersus* Mars1 (X99080), *Neurospora crassa* Tad1 (L25662), *Drosophila melanogaster* R1 (X51968), *Bradysia coprophila* R1 (L00945), *Bombyx mori* R1 (M19755), *Bombyx mori* TRAS1 (D38414), *Aphonopelma* sp. R1 (AF015489), *Bombyx mori* SART1 (D85594), *Anopheles gambiae* RT1 (M93690), *Anopheles gambiae* RT2 (M93691), *Drosophila silvestris* LOA (X60177), *Aedes aegypti* Lian (U87543), *Drosophila miranda* TRIM (X59239), *Drosophila subobscura* Bilbo (U73800), *Drosophila melanogaster* Jockey (M22874), *Drosophila funebris* Jockey (M38437), *Drosophila melanogaster* TART (U14101), *Drosophila melanogaster* Doc (X17551), *Drosophila melanogaster* F (M17214), *Peridroma saucia* YAKPs1, *Drosophila melanogaster* BS (X77571), *Drosophila yakuba* Helena (AF012049), *Drosophila mauritiana* Helena (AF012043), *Bombyx mori* AMY (U07847), *Aedes aegypti* JuanA (M95171), *Culex pipiens* JuanC (M91082), *Chironomus tentans* NCR1Cth (L79944), *Anopheles gambiae* T1 (M93689), *Anopheles gambiae* Q (U03849), *Gallus gallus* CR1 (U88211), *Acanthochelys spixii* CR1 (AB005891), *Schistosoma mansoni* SR1 (U66331), *Biomphalaria glabrata* BGR (X60372), *Drosophila melanogaster* I (M14954), *Drosophila teissieri* I (M28878), *Trypanosoma brucei* ingi (X05710), *Trypanosoma cruzi* L1Tc (X83098). Group II introns: *Streptococcus agalactiae* (WP\_000561483), *Leptospira santarosai* (ZP\_13300096), *Escherichia coli* (ZP\_13884144), *Acetonea longum* (ZP\_08623276), *Mycobacterium* sp. (WP\_011779439), *Bacillus coagulans* (WP\_014095942), *Clostridium kluveri* (WP\_011988638), *Rhodococcus jostii* (WP\_011598972), *Frankia* sp. (WP\_011436613).

Figure S5 (continued)

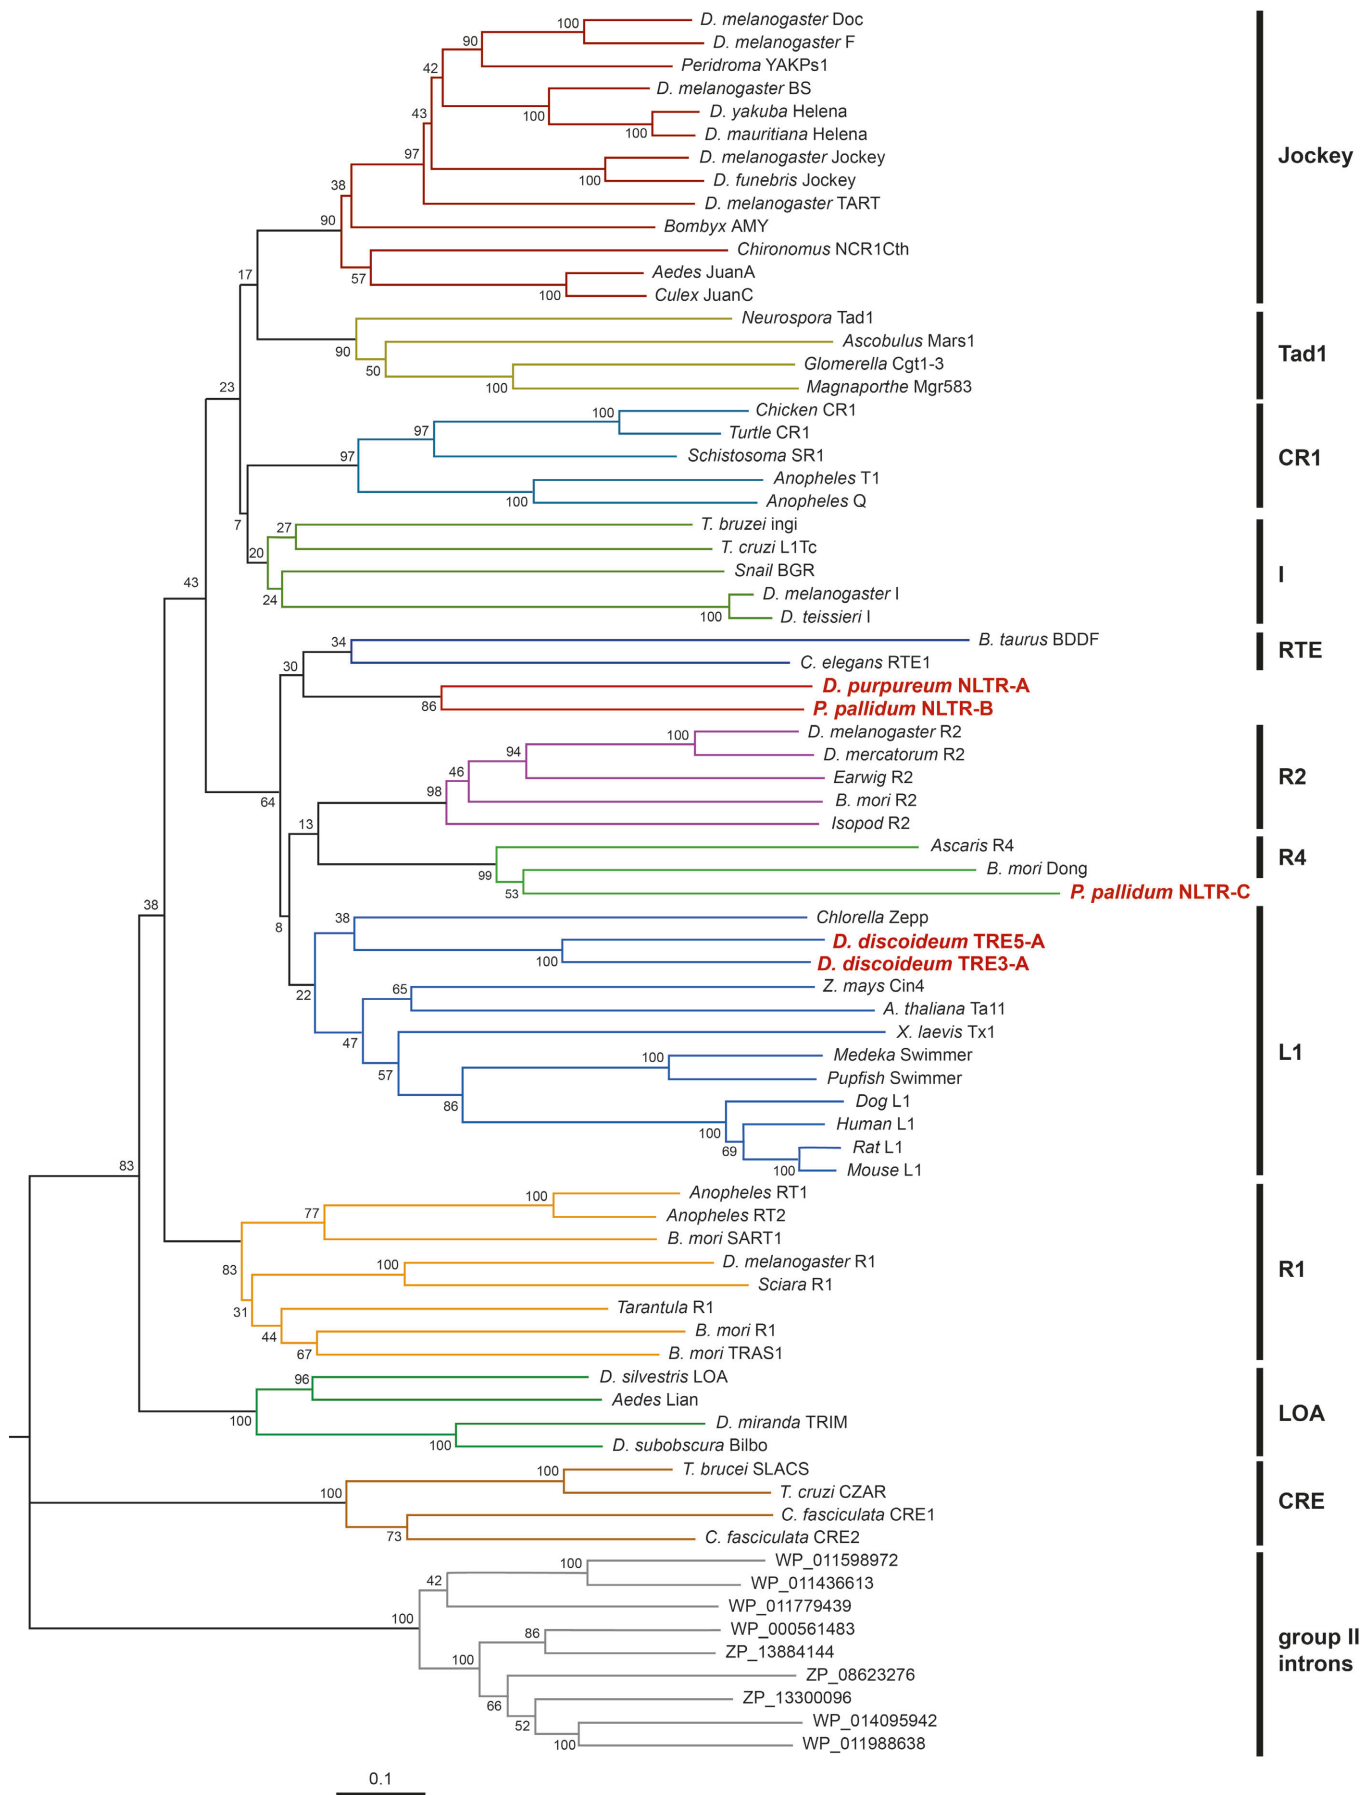



**Figure S6: Alignment of dictyostelid non-LTR elements bearing RNH domains.**

Core domains of ribonuclease H (RNH) were determined by searching the Conserved Domain Database [4]. Alignments were generated with CLUSTALX [1]. Shading is to a 50% consensus and was generated with BOXSHADE [2]. Black boxes indicate invariant amino acids and gray boxes represent similar amino acids. Sequences used for alignment with *D. purpureum* NLTR-A and *P. pallidum* NLTR-B were chosen according to a previous phylogenetic analysis performed by Malik et al. [7]: *Bombyx mori* TRAS (GenBank D38414), *Aphonopelma* sp. R1 (AF015489), *Drosophila melanogaster* I (M14954), *Trypanosoma brucei* ingi (X05710), *Colletotrichum gloeosporioides* Cgt1-3 (L76169), *Magnaporthe grisea* Mgr583 (AF018033), *Aedes aegypti* Lian (U87543), and *Drosophila miranda* TRIM (X59239).

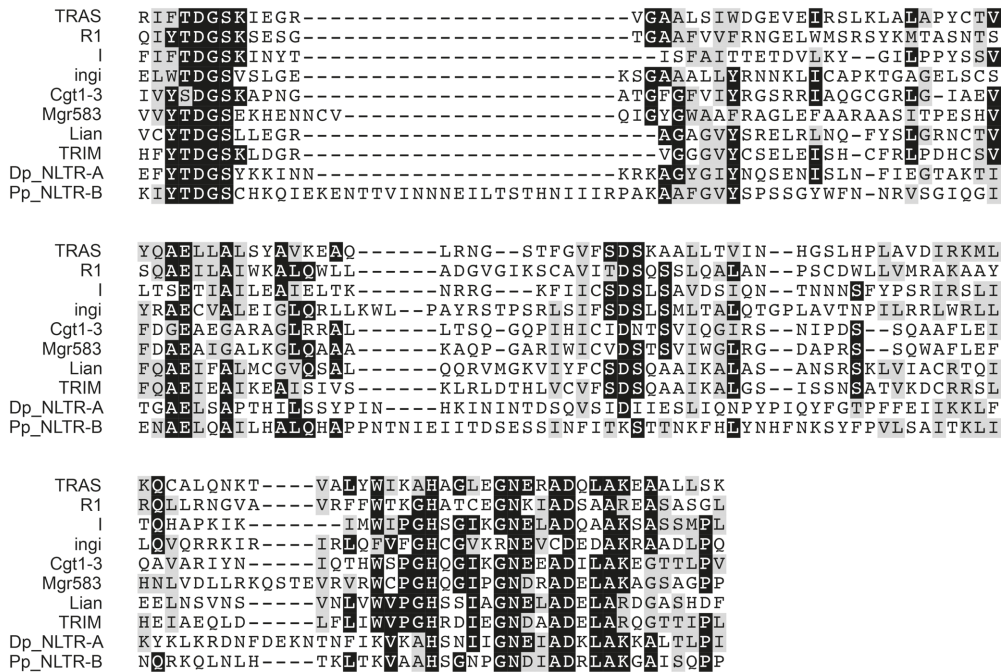

**Table S1: Comparison of retrotransposon in annotated dictyostelid genomes.**

|                                          | <i>Dictyostelium discoideum</i> | <i>Dictyostelium purpureum</i> | <i>Dictyostelium lacteum</i> | <i>Polysphondylium pallidum</i> | <i>Dictyostelium fasciculatum</i> |
|------------------------------------------|---------------------------------|--------------------------------|------------------------------|---------------------------------|-----------------------------------|
| Haploid genome size (Mb)                 | 34                              | 33                             | 23                           | 33                              | 31                                |
| Number of genes                          | 12,646                          | 12,410                         | 10,225                       | 12,675                          | 12,430                            |
| Gene density (CDS/Mb)                    | 372                             | 376                            | 444                          | 384                             | 401                               |
| Number of tRNA genes                     | 418                             | 353                            | 57                           | 273                             | 198                               |
| Retrotransposons total (%)               | 8.1                             | 0.9                            | 0.000003                     | 0.7                             | 0.6                               |
| non-LTR retrotransposons (%)             | 3.7                             | 0.5                            | 0.000002                     | 0.3                             | 0.3                               |
| LTR retrotransposons (%)                 | 1.1                             | 0.4                            | 0.000001                     | 0.3                             | 0.3                               |
| YR retrotransposons (%)                  | 3.3                             | 0                              | 0                            | 0                               | 0,1                               |
| tRNA gene-targeting retrotransposons (%) | 3.8                             | 0.9                            | 0.000002                     | 0.4                             | 0.4                               |
| References                               | [8, 9]                          | [10]                           | Genbank<br>LODT01000000      | [11]                            | [11]                              |

CDS: coding sequence; YR: tyrosine recombinase.

**Table S2: Association of tRNA genes with TREs in the *D. discoideum* genome.**

The individual tRNA gene loci were inspected for the presence of TRE5 or TRE3 elements. The tRNA genes on chromosomes 1-6 were extracted from genome assembly file "*D. discoideum* Non-coding sequences" as of 03-29-2016 ([www.dictybase.org](http://www.dictybase.org)). \* Note that TRE elements can target the same tRNA genes sequentially, producing tandems. Only the first TRE of such tandems directly adjacent to the targeted tRNA gene was considered in this analysis.

| Chromosome | tRNA genes | TREs* | % tRNA genes occupied* |
|------------|------------|-------|------------------------|
| 1          | 79         | 52    | 65.8                   |
| 2          | 91         | 56    | 61.5                   |
| 3          | 79         | 45    | 57.0                   |
| 4          | 33         | 21    | 63.6                   |
| 5          | 34         | 18    | 52.9                   |
| 6          | 87         | 54    | 62.1                   |
| total      | 403        | 246   | 61.0                   |

## Supplemental references

1. Thompson JD, Gibson TJ, Plewniak F, Jeanmougin F, Higgins DG. The ClustalX windows interface: flexible strategies for multiple sequence alignment aided by quality analysis tools. *Nuc Acids Res.* 1997;24:4876-82.
2. BoxShade. [http://www.ch.embnet.org/software/BOX\\_form.html](http://www.ch.embnet.org/software/BOX_form.html).
3. Malik HS, Eickbush TH. Modular evolution of the integrase domain in the Ty3/gypsy class of LTR retrotransposons. *J Virol.* 1999;73:5186-90.
4. Marchler-Bauer A, Derbyshire MK, Gonzales NR, Lu S, Chitsaz F, Geer LY et al. CDD: NCBI's conserved domain database. *Nucleic Acids Res.* 2015;43(Database issue):D222-D6.
5. Kumar S, Stecher G, Tamura K. MEGA7: Molecular Evolutionary Genetics Analysis version 7.0 for bigger datasets. *Mol Biol Evol.* 2016;Mar 22. pii: msw054. [Epub ahead of print].
6. Felsenstein J. Confidence limits on phylogenies: An approach using the bootstrap. *Evolution.* 1985;39:783-91.
7. Malik HS, Burke WD, Eickbush TH. The age and evolution of non-LTR retrotransposable elements. *Mol Biol Evol.* 1999;16:793-805.
8. Glöckner G, Szafranski K, Winckler T, Dingermann T, Quail M, Cox E et al. The complex repeats of *Dictyostelium discoideum*. *Genome Res.* 2001;11:585-94.
9. Eichinger L, Pachebat JA, Glöckner G, Rajandream M-A, Sucgang R, Berriman M et al. The genome of the social amoeba *Dictyostelium discoideum*. *Nature.* 2005;435:43-57.
10. Sucgang R, Kuo A, Tian X, Salerno W, Parikh A, Feasley CL et al. Comparative genomics of the social amoebae *Dictyostelium discoideum* and *Dictyostelium purpureum*. *Genome Biol.* 2011;12:R20.
11. Heidel AJ, Lawal HM, Felder M, Schilde C, Helps NR, Tunggal B et al. Phylogeny-wide analysis of social amoeba genomes highlights ancient origins for complex intercellular communication. *Genome Res.* 2011;21:1882-91.
